# Supplementary material for: Giant effect of spin–lattice coupling on the thermal transport in two-dimensional ferromagnetic CrI3
Source: Royal Society of Chemistry journal article supplement (doi:10.1039/c9tc05928h), 2020-01-01
Supplement: c9tc05928h3.pdf [file c9tc05928h3.pdf]

*Supplemental Material*

**Giant effect of spin-lattice coupling on the thermal transport  
in two-dimensional ferromagnetic CrI<sub>3</sub>**

Guangzhao Qin,<sup>1,2\*†</sup> Huimin Wang,<sup>3,1,2†</sup> Lichuan Zhang,<sup>4</sup> Zhenzhen Qin,<sup>5\*</sup> and Ming Hu,<sup>2\*</sup>

<sup>1</sup> State Key Laboratory of Advanced Design and Manufacturing for Vehicle Body, College of Mechanical and Vehicle Engineering, Hunan University, Changsha 410082, P. R. China

<sup>2</sup> Department of Mechanical Engineering, University of South Carolina, Columbia, SC 29208, USA

<sup>3</sup> National Laboratory of Solid State Microstructures, College of Engineering and Applied Sciences, Jiangsu Key Laboratory of Artificial Functional Materials, and Collaborative Innovation Center of Advanced Microstructures, Nanjing University, Nanjing 210093, China

<sup>4</sup> Peter Grünberg Institut and Institute for Advanced Simulation, Forschungszentrum Jülich and JARA, 52425 Jülich, Germany

<sup>5</sup> School of Physics and Microelectronics, Zhengzhou University, Zhengzhou 450001, China

\* Corresponding authors: [gzzqin@hnu.edu.cn](mailto:gzzqin@hnu.edu.cn), [qzz@zzu.edu.cn](mailto:qzz@zzu.edu.cn), [hu@sc.edu](mailto:hu@sc.edu)

† Equal Contribution

Table SI: The lattice constant, bond lengths and bond angles for CrI<sub>3</sub> in PM and FM states are listed, respectively. The labeled structure diagram is also presented.

| PM                                               |         | FM                                               |         | Side view of the structure                                                         |
|--------------------------------------------------|---------|--------------------------------------------------|---------|------------------------------------------------------------------------------------|
| a, b (Å)                                         | 6.992   | a, b (Å)                                         | 7.003   | 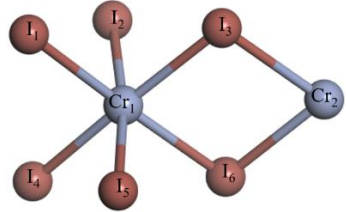 |
| Cr <sub>1</sub> -I <sub>1/2/3</sub> (Å)          | 2.67227 | Cr <sub>1</sub> -I <sub>1/2/3</sub> (Å)          | 2.73721 |                                                                                    |
| Cr <sub>1</sub> -I <sub>4/5/6</sub> (Å)          | 2.67215 | Cr <sub>1</sub> -I <sub>4/5/6</sub> (Å)          | 2.73715 |                                                                                    |
| Cr <sub>1</sub> -Cr <sub>2</sub> (Å)             | 4.037   | Cr <sub>1</sub> -Cr <sub>2</sub> (Å)             | 4.403   |                                                                                    |
| ∠I <sub>1</sub> Cr <sub>1</sub> I <sub>3</sub> , |         | ∠I <sub>1</sub> Cr <sub>1</sub> I <sub>3</sub> , |         |                                                                                    |
| ∠I <sub>1</sub> Cr <sub>1</sub> I <sub>2</sub> , | 90.947° | ∠I <sub>1</sub> Cr <sub>1</sub> I <sub>2</sub> , | 90.625° |                                                                                    |
| ∠I <sub>2</sub> Cr <sub>1</sub> I <sub>3</sub>   |         | ∠I <sub>2</sub> Cr <sub>1</sub> I <sub>3</sub>   |         |                                                                                    |
| ∠I <sub>4</sub> Cr <sub>1</sub> I <sub>5</sub> , |         | ∠I <sub>4</sub> Cr <sub>1</sub> I <sub>5</sub> , |         |                                                                                    |
| ∠I <sub>5</sub> Cr <sub>1</sub> I <sub>6</sub> , | 90.955° | ∠I <sub>5</sub> Cr <sub>1</sub> I <sub>6</sub> , | 90.630° |                                                                                    |
| ∠I <sub>4</sub> Cr <sub>1</sub> I <sub>6</sub>   |         | ∠I <sub>4</sub> Cr <sub>1</sub> I <sub>6</sub>   |         |                                                                                    |
| ∠I <sub>1</sub> Cr <sub>1</sub> I <sub>2</sub>   | 81.898° | ∠I <sub>1</sub> Cr <sub>1</sub> I <sub>2</sub>   | 84.786° |                                                                                    |

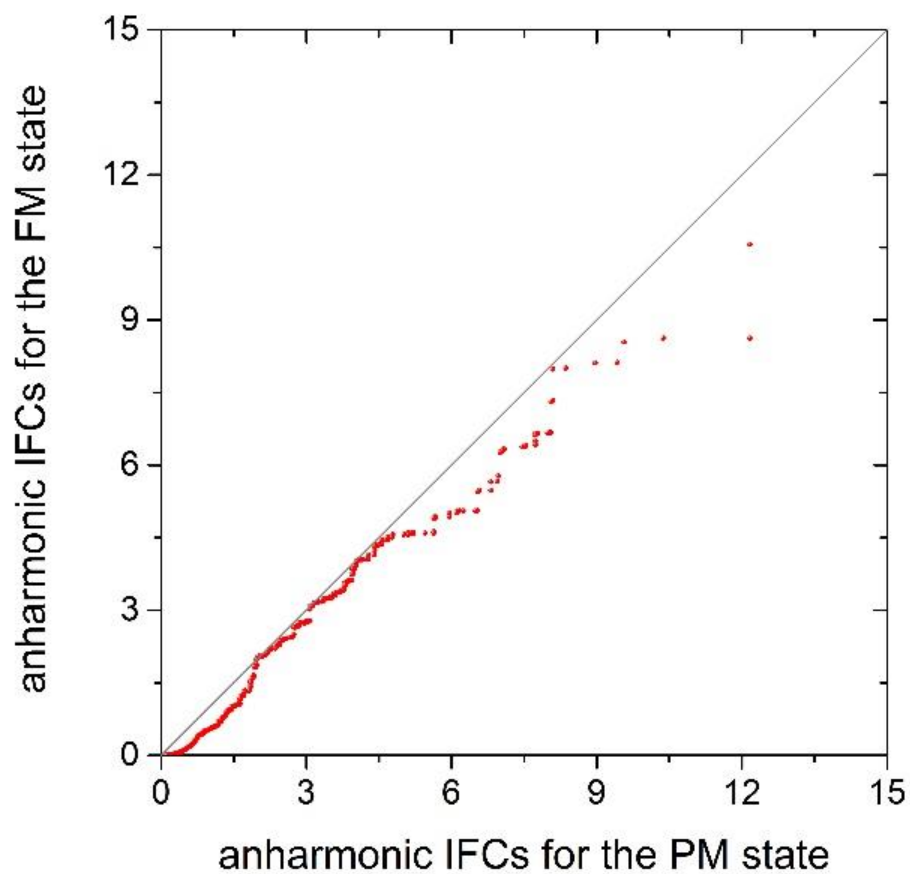

Figure S1: The comparison of anharmonic IFCs between FM and PM phases (red scatter plot). The solid grey line with a slope of 1 is plotted for clear comparison.

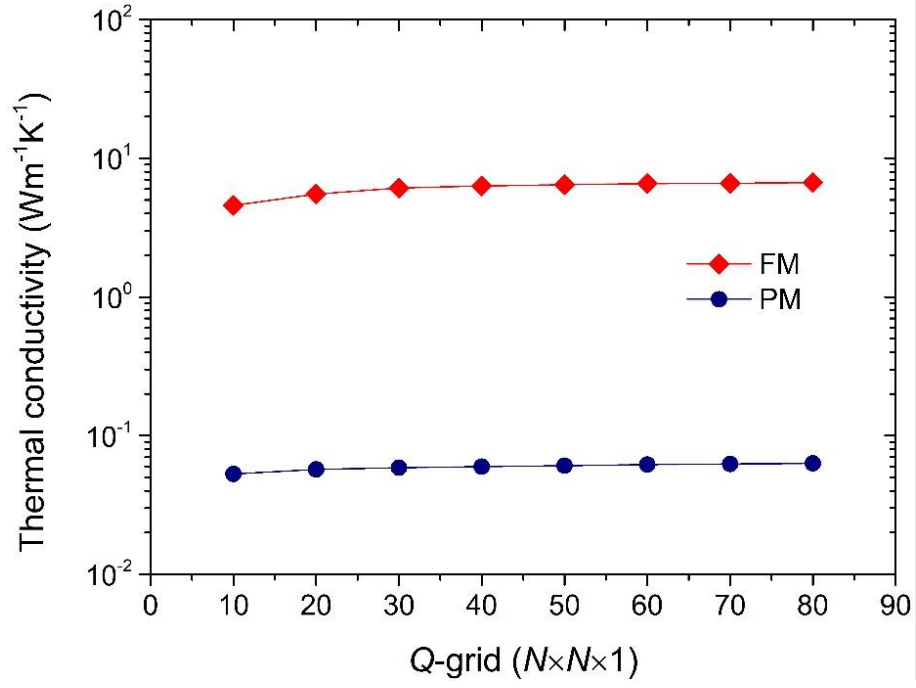

Figure S2: The test curve of interrogation grid ( $N \times N \times 1$ ) on the thermal conductivity calculation for  $\text{CrI}_3$  in FM and PM states. In our calculations,  $70 \times 70 \times 1$  is chosen to achieve the converged thermal conductivity.

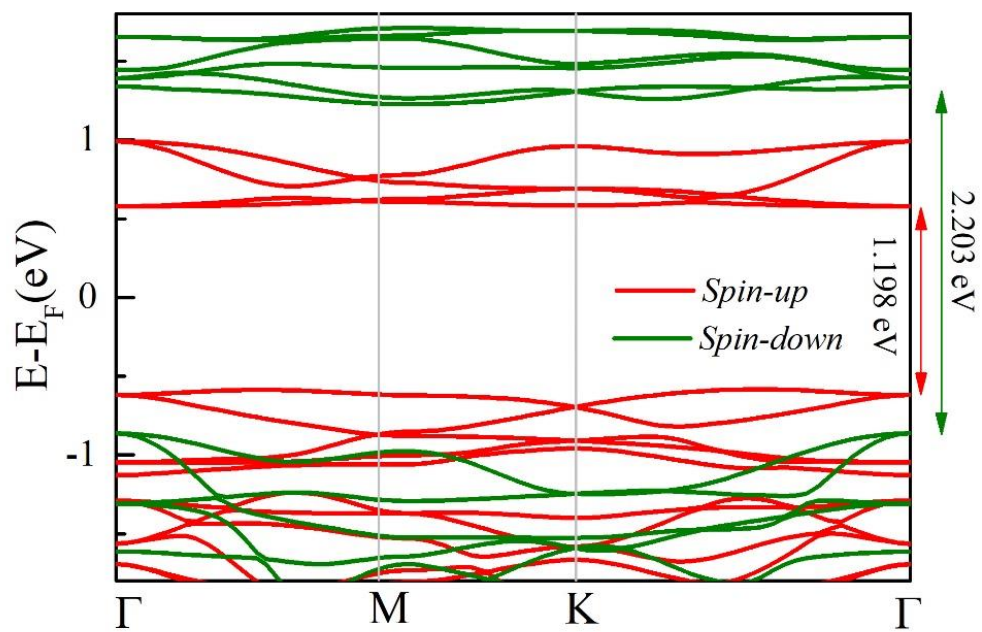

Figure S3: The calculated band structure for ferromagnetic CrI<sub>3</sub>. The red and green bands represent the spin-up and spin-down electronic states.
